# Supplementary material for: Anti-Septic Functions of Cornuside against HMGB1-Mediated Severe Inflammatory Responses
Source: MDPI journal article supplement (doi:10.3390/ijms23042065), 2022-02-13
Supplement: s1 [file s1]

The effects of CN on HMGB1 release by LPS (100 ng/mL, 16 h) action in HUVECs .

\*p < 0.05 versus group treated with LPS alone .

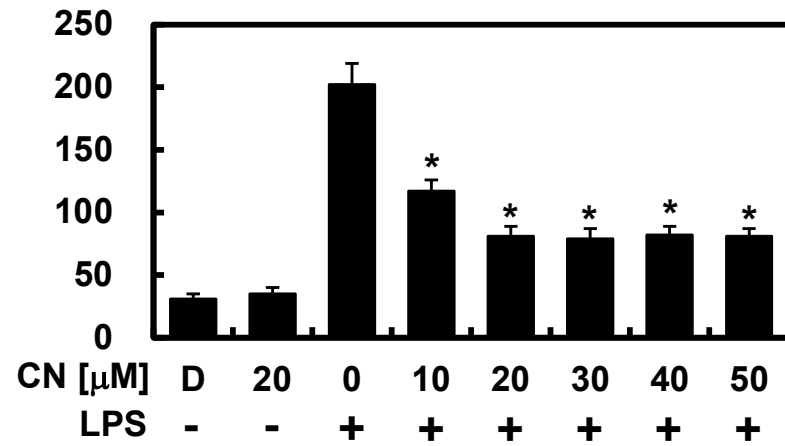

**Supple Figure S1**

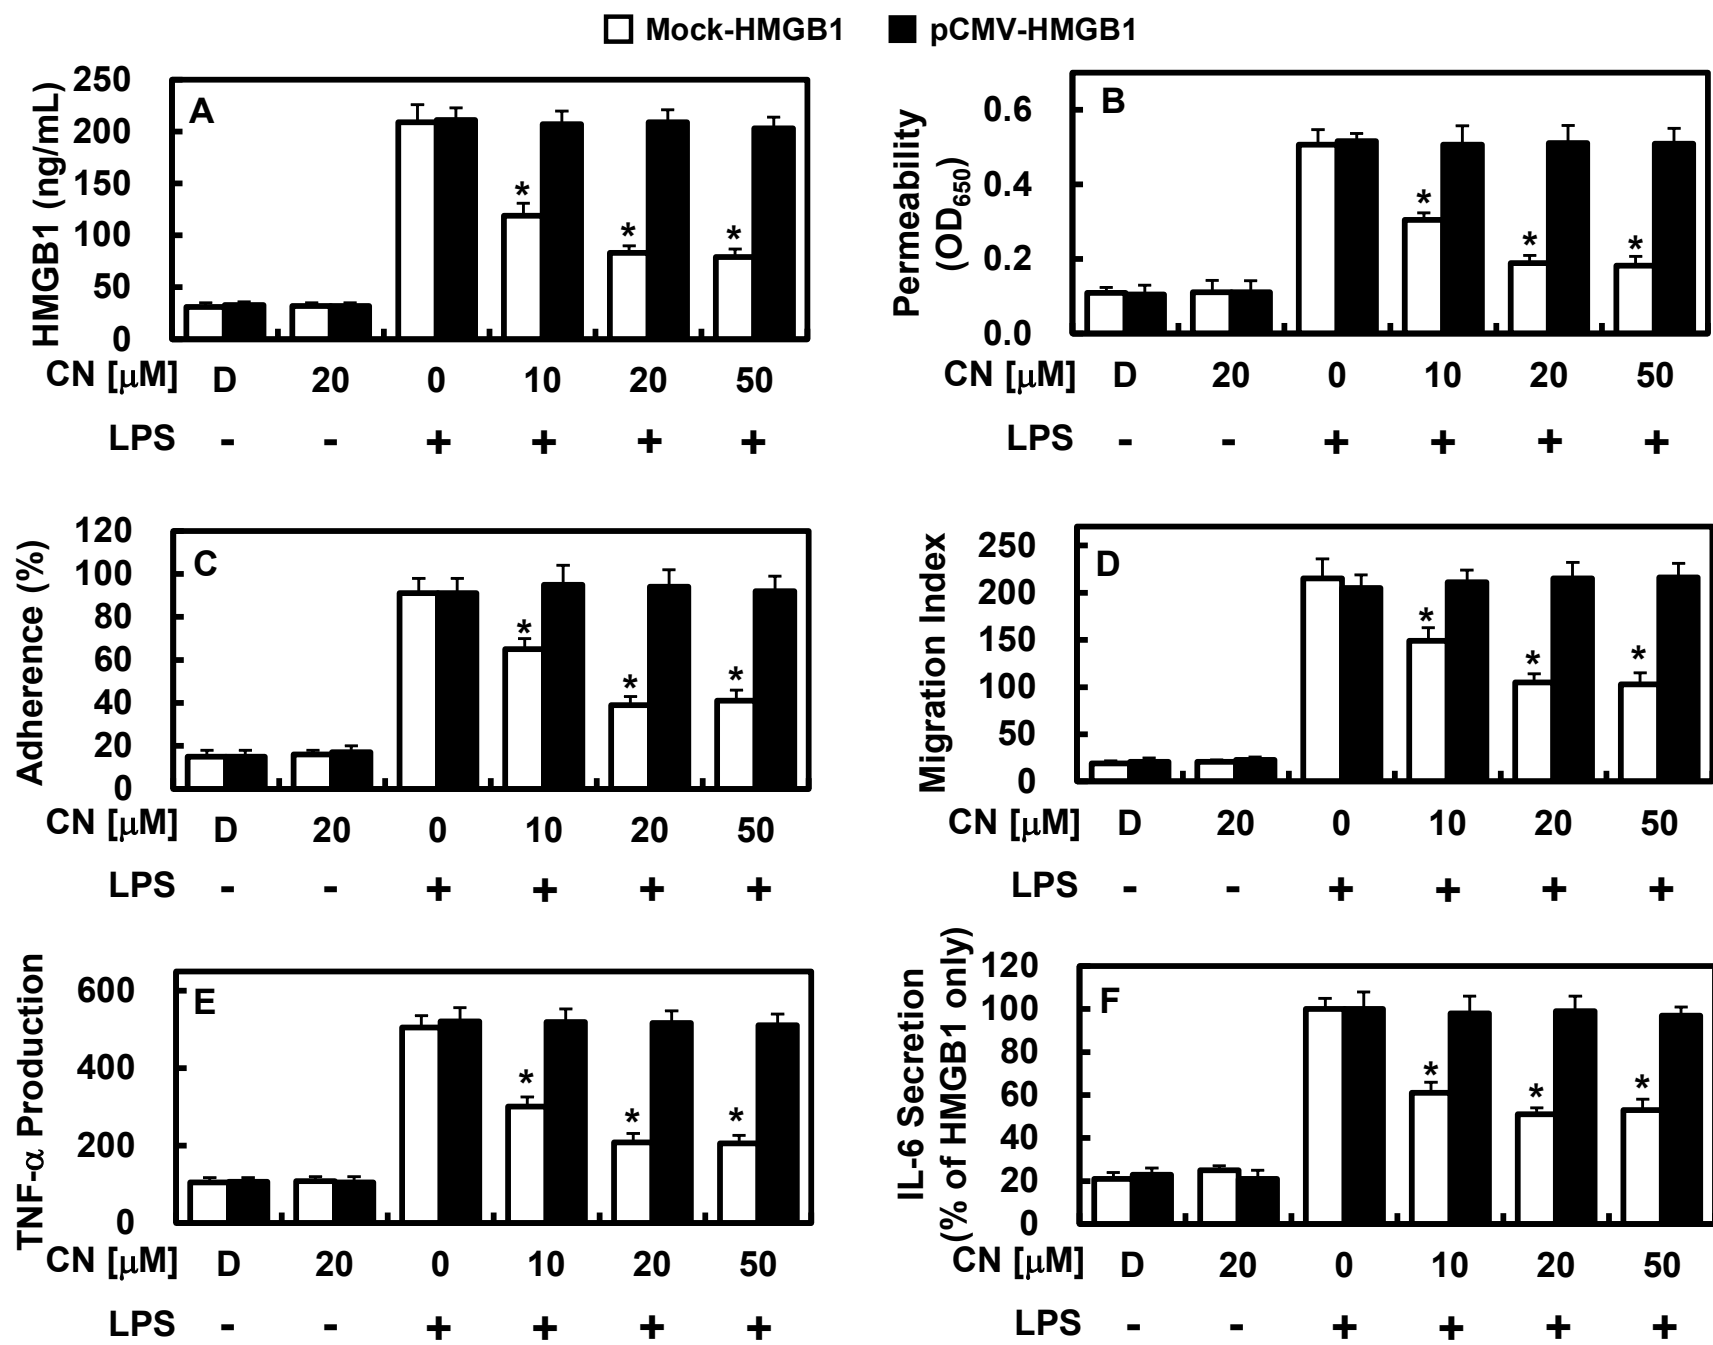

**Supple Figure S2**
